# Supplementary material
Source: PubMed Central journal article supplement (PMC4630867)
Supplement: NIHMS65368-supplement-1.pdf [file NIHMS65368-supplement-1.pdf]

**Supplemental Material: A Gauge Invariant Multiscale  
Approach to Magnetic Spectroscopies in Condensed Phase:  
General Three-Layer Model, Computational Implementation  
and Pilot Applications**

Filippo Lipparini

*Scuola Normale Superiore, Piazza dei Cavalieri, 7 I-56126 Pisa, Italy*

Chiara Cappelli<sup>a</sup>

*Scuola Normale Superiore,*

*Piazza dei Cavalieri, 7 I-56126 Pisa,*

*Italy and Dipartimento di Chimica e Chimica Industriale,*

*Università di Pisa,*

*via Risorgimento, 35 I-56126 Pisa, Italy*

Vincenzo Barone

*Scuola Normale Superiore,*

*Piazza dei Cavalieri,*

*7 I-56126 Pisa, Italy*

---

<sup>a</sup> Corresponding author: e-mail: chiara.cappelli@sns.it

TABLE I. Absolute chemical shifts (ppm) of pyrimidine in vacuo and solvent shifts (ppm) as obtained with different solvent representations. For the cluster approaches, two explicit water molecules are included at the QM, classical MM and FQ levels of theory, respectively, possibly including the PCM embedding (/PCM). The RMS and Max errors are reported with respect to QM/PCM.

| Atom | Vacuum | QM    | QEq   | FQ    | PCM   | QM/PCM | QEq/PCM | FQ/PCM |
|------|--------|-------|-------|-------|-------|--------|---------|--------|
| C2   | 14.35  | 3.20  | 1.20  | 1.34  | 0.71  | 3.11   | 1.31    | 1.52   |
| N1   | -78.09 | 15.47 | 12.45 | 14.35 | 11.55 | 21.55  | 18.76   | 21.26  |
| C4   | 18.82  | -0.87 | -0.98 | -1.07 | -1.49 | -1.43  | -1.77   | -1.92  |
| C5   | 57.56  | -1.34 | -0.89 | -1.01 | -2.20 | -3.00  | -2.62   | -2.77  |
| H-C4 | 22.62  | -0.12 | -0.12 | -0.12 | -0.12 | -0.10  | -0.13   | -0.13  |
| H-C2 | 22.01  | 0.23  | 0.17  | 0.17  | 0.09  | 0.19   | 0.15    | 0.17   |
| H-C5 | 24.30  | -0.26 | -0.16 | -0.18 | -0.40 | -0.56  | -0.47   | -0.50  |
| RMS  | -      | 5.73  | 13.02 | 8.45  | 15.19 | -      | 1.61    | 0.42   |
| Max  | -      | 6.08  | 9.09  | 7.20  | 9.99  | -      | 2.79    | 1.60   |
